# Supplementary material for: A gene expression study of dorso-ventrally restricted pigment pattern in adult fins of Neolamprologus meeli, an African cichlid species
Source: PeerJ. 2017 Jan 10;5:e2843. doi: 10.7717/peerj.2843 (PMC5228514; doi:10.7717/peerj.2843)
Supplement: Table S1 [file peerj-05-2843-s001.xlsx]

## Sheet: Table S1
	qPCR Primer sequences and information about candidate reference genes.
	Symbol	Gene Description	Primer Sequence (5’- 3’)	Product Size (bp)	Efficiency (E %)	R2 *	Melting Temperature (°C)	Accession ID
	actb1	Actin Beta 1	F_CCCTCTTCCAGCCTTCCTTCCT	130	97.8	0.997	85.9 ± 0.3	XM_006797985.1
			R_GTACCTCCAGACAGCACGGTGTTG
	efl1α	Elongation Factor 1 Alpha	F_TACCCACCCCTTGGTCGT	76	94.4	0.991	81.1 ± 0.1	XM_006783557.1
			R_TCTCCACACCTTTAATCACGCC
	gapdh	Glyceraldehyde-3-phosphate Dehydrogenase	F_ATCAAGAAGGTTGTGAAGGCTGC	83	102.4	0.996	81.7 ± 0.2	XM_006802885.1
			R_TCTGTGGACACGACCTGGTG
	hprt1	Hypoxanthine Phosphoribosyltransferase 1	F_CTGTCTACTCTGACAGGCAAGAATG	137	92.8	0.989	82.15 ± 0.1	XM_006781819.1
			R_CTCTTCACCAGCAAACTCGCTAC
	rps11	Ribosomal Protein S11	F_GTATTCTCTCTGGTGTGGTGACC	163	92.7	0.99	79.3 ± 0.1	XM_006798201.1
			R_ATGTCTCCAACTGTGACGTCTCTA
	rpl8	Ribosomal Protein S18	F_CATCCCTGAGAAGTTCCAGCACA	103	96.3	0.994	77.66 ± 0.1	XM_006810970.1
			R_TCTGCCAACACCCTTGATGG
	tbp	TATA Box Binding Protein	F_CCTCAGGGAGCCATGACC	75	93	0.992	75.36 ± 0.1	XM_006780500.1
			R_CTGGGGTGTCAGACCAGAG
	(*) R2, correlation coefficient of the slope of the standard curve.
	qPCR Primer sequences and information about candidate target genes.
	Symbol	Gene Description	Primer Sequence (5’- 3’)	Product Size (bp)	Efficiency (E %)	R2 *	Melting Temperature (°C)	Accession ID
	ap2a	Activating Enhancer Binding Protein 2 Alpha	F_CCACGAAGCAAGTCTGCAAAGA	92	98.4	0.993	85.9 ± 0.3	XM_006794724.1
			R_CGGTTCAAGAATGGGCTGTGG
	bnc2	Basonuclin 2	F_CTCCTCTACAGAATGTCCCAGCAG	141	101.3	0.993	81.1 ± 0.1	XM_006787079.1
			R_GAGCTTGTCCAGAGCATGAGCT
	csf1r	Colony Stimulating Factor 1 Receptor	F_GCAATGCACGTCTGCCAGTG	76	95.3	0.998	81.7 ± 0.2	XM_006781460.1
			R_ACGTCACTCTGGACGGTGT
	ece2	Endothelin Converting Enzyme 2	F_GGCATCAGATGGACGTGCGT	162	95.3	0.99	82.15 ± 0.1	XM_006786586.1
			R_GGCTGATCTCTGTGAGTGCTTGG
	ednrb1	Endothelin Receptor Subtype B1	F_GCGTTGAGTATTGACAGGTATCGTG	154	96.3	0.994	79.3 ± 0.1	AB178935.1
			R_TGGTGATCATGTCGAAGGCTATCG
	fbxw4	F-Box And WD Repeat Domain Containing 4	F_TCGTCGTGGTGCTGGTGT	116	91.5	0.999	77.66 ± 0.1	XM_006809666.1
			R_CACACTTCCTTGGGCAGAGTC
	igsf11	Immunoglobulin Superfamily Member 11	F_TCTGCATGGAGGGTTCAAGGT	118	97.9	0.998	86.76 ± 0.6	XM_006803913.1
			R_GGCAGGATGGCTGCTTGG
	irf1	Interferon Regulatory Factor 1	F_AGGGAAGGAAGAAGAGTTCAGTGG	81	95.4	0.998	76.66 ± 0.2	XM_006785007.1
			R_GTGCAGGGATGGGAGACTGAG
	irf2	Interferon Regulatory Factor 2	F_ACCTAACAGACCGCAATGCC	83	96.7	0.999	79.9 ± 0.8	XM_006781902.1
			R_CCTGGAATCTGACAGGATTCGATTTG
	kir7.1	Inward Rectifier K(+) Channel Kir7.1	F_GCACTATGTTCCCCAGTGGAG	110	89.5	0.994	83.06 ± 0.1	XR_437540.1
			R_CTTGGCTACAAATGCACCTGTGA
	kita	KIT Proto-Oncogene Receptor Tyrosine Kinase	F_CATTGACCCAACCCAGCTACC	81	102.6	0.999	81.68 ± 0.1	XM_006790192.1
			R_GATCCCAGAGTCTTCCCAAAGC
	ltk	Leukocyte Receptor Tyrosine Kinase	F_GCCACAGCAACCACAGAGTAC	79	97.5	0.994	80.54 ± 0.1	XM_006786219.1
			R_GAAGTGTCCATCAGACCTTCCCTC
	mef2c	Myocyte Enhancer Factor 2C	F_CATGCCGTCCATTAACCAGAGA	107	107.6	0.998	79.69 ± 0.6	XM_006784119.1
			R_CGCCCATGCCTTGTCCTG
	mitfa	Microphthalmia-Associated Transcription Factor	F_CCCAAGTCAAATGATCCAGACATGC	101	94.5	0.998	80.19 ± 0.1	XM_006784739.1
			R_TTGGCTCTCTGCTGCTCTCG
	mpv17	Mitochondrial Inner Membrane Protein V17	F_GCTCAGGAGGGACTACACAGA	70	102.2	0.999	81.36 ± 0.1	XM_006793542.1
			R_ATTGGCAATCTGGACTGGAGGC
	oct1	Octamer-Binding Transcription Factor 1	F_CAACTCAGCCTGCAACCCC	131	104.6	0.998	77.56 ± 0.2	XM_006788252.1
			R_CTCCAGCTCCTCAAGGTCACT
	pmel	Premelanosome Protein	F_CAGTTCTCCATCACTGATCAAATCCC	96	95.5	0.998	81.3 ± 0.1	XM_006793991.1
			R_TCGCCCTGTTCTGGATGAAGC
	pou3f2	POU Domain Class 3, Transcription Factor 2	F_AGCACAGCCACAACGCACA	105	93.6	0.998	77.7 ± 0.1	XM_006797223.1
			R_CCCCCCTTGCTCTCCCCC
	slc24a5	Solute Carrier Family 24 Member 5	F_CACCTGAACTAGTCACAGCCTTCC	144	96.8	0.966	78.9 ± 0.2	XM_006793923.1
			R_TGAGACGCCCAGCCATAGA
	slc45a2	Solute Carrier Family 45 Member 2	F_TGCTGTCATCTCAGCACTCGTCAG	79	97.3	0.988	79.05 ± 0.2	XM_006789101.1
			R_CACGACTCCAAACATCACCACC
	sox10	SRY (Sex Determining Region Y)-Box 10	F_CCACTCCCAGTCTCACTACAAGA	120	101.5	0.999	80.33 ± 0.2	XM_006787376.1
			R_CTGTGACCCTGACCAGCAG
	(*) R2, correlation coefficient of the slope of the standard curve.
