# Supplementary material for: A gene expression study of dorso-ventrally restricted pigment pattern in adult fins of Neolamprologus meeli, an African cichlid species
Source: PeerJ. 2017 Jan 10;5:e2843. doi: 10.7717/peerj.2843 (PMC5228514; doi:10.7717/peerj.2843)
Supplement: Table S3 [file peerj-05-2843-s005.xlsx]

## Sheet: Statistical results
		p values
		Relative expression / Melanophores density
		ltk	slc24a5	igsf11	mitfa	slc45a2	mpv17	pmel	ap2a	irf1	irf2	mef2c	pou3f2
	D1 / Cd1	0.41264	0.18858	0.1861	0.34663	0.678369	0.0477458	0.147611	0.282386	0.00851789	0.121403	0.0469791	0.000196556
	D1 / Cv1	0.679321	0.751334	0.00221085	0.0462822	0.0529602	0.0708153	0.00838045	0.490826	0.000537485	0.00202652	0.0958888	0.00160972
	D1 / A1	0.564298	0.00931635	0.00173024	0.0525424	0.207723	0.453777	0.00256743	0.00173979	0.00045234	2.4338e-05	0.206995	0.151164
	Cd1 / Cv1	0.310269	0.308362	0.00625528	0.191489	0.0404223	0.718343	0.00752473	0.0249301	0.00486597	0.117139	0.870157	0.256221
	Cd1 / A1	0.995344	0.000619126	0.0045633	0.194139	0.263705	0.0371287	0.00130499	0.000209382	0.00307245	0.000804131	0.835873	0.121997
	Cv1 / A1	0.425433	0.00569609	0.787186	0.811366	0.782139	0.0491145	0.0481943	0.00137515	0.544701	0.00206326	0.786879	0.311012
		p values
		Melanophores density
	distal			middle			proximal
	D1 / Cd1	0.745971		D2 / Cd2	0.833548		D3 / Cd3	0.794454
	D1 / Cv1	0.00811328		D2 / Cv2	0.00207245		D3 / Cv3	0.799116
	D1 / A1	0.00375522		D2 / A2	0.00180245		D3 / A3	0.023748
	Cd1 / Cv1	0.00438045		Cd2 / Cv2	0.00125375		Cd3 / Cv3	0.837926
	Cd1 / A1	0.00161913		Cd2 / A2	0.00115234		Cd3 / A3	0.0519131
	Cv1 / A1	0.844701		Cv2 / A2	0.8747		Cv3 / A3	0.0637888
		p values
		Relative expression
		ap2a	irf1	irf2	mef2c	oct1	pou3f2	pmel	ltk	slc24a5	igsf11	mitfa	slc45a2	mpv17
	D1 / Cd1	0.133246	0.000361437	0.0218745	0.00173375	0.574421	0.000541466	0.0671854	0.586316	0.0199437	0.209105	0.455363	0.763416	0.0840765
	D1 / A1	0.0419841	0.00106283	0.000485727	0.597891	0.546371	0.020437	1.30395e-05	0.013612	0.000311854	0.000301525	0.00289155	0.0196362	0.0404948
	D1 / Cv1	0.000678493	1.15488e-05	0.0562056	0.285096	0.101715	0.000540392	1.75234e-05	0.0271214	0.0181731	0.000193688	0.00214147	0.00277248	0.00338426
	Cd1 / A1	0.0102088	0.0344385	0.0192571	0.0219901	0.748854	0.321641	0.000143983	0.0606432	7.89136e-06	3.2755e-05	0.0154125	0.0131469	0.816631
	Cd1 / Cv1	0.00372384	0.00459677	0.173582	0.00114077	0.0934791	0.958772	0.000301215	0.166497	7.6949e-05	2.3634e-06	0.0139594	0.000306936	0.0899965
	Cv1 / A1	0.000617758	0.439252	0.00181396	0.894171	0.180179	0.313137	0.0633992	0.249663	0.00132731	0.724438	0.72469	0.80672	0.027201
	D2 / Cd2	0.0848463	0.00499571	0.823255	0.0268865	0.216623	0.158934	0.0129348	0.52087	0.00219989	0.801201	0.525347	0.0102021	0.110813
	D2 / A2	0.00289366	0.00208348	0.871684	0.40352	0.044375	0.272276	7.31288e-05	0.000102383	0.0328402	0.00024655	0.0497835	0.0225972	0.259846
	D2 / Cv2	0.0147534	0.00131222	0.642161	0.0495695	0.0122034	0.123046	0.000332456	0.000518448	0.000506968	6.60915e-05	0.649707	0.000797962	0.107164
	Cd2 / A2	0.00264706	0.0458021	0.948325	0.0841229	0.895887	0.257567	7.13528e-05	6.34766e-06	0.00137127	0.000193473	0.0412855	0.324644	0.0172828
	Cd2 / Cv2	0.0518624	0.072666	0.507227	0.461724	0.144067	0.687556	0.00104187	0.000187072	0.000199572	4.65063e-05	0.725534	0.00444043	0.772909
	Cv2 / A2	0.032373	0.414002	0.53785	0.11114	0.0717001	0.104233	0.427024	0.319082	0.00216022	0.427121	0.0346417	0.364388	0.0233206
	D3 / Cd3	0.8849	0.709161	0.290077	0.0118603	0.0958758	0.690657	0.0355383	0.285387	0.56894	0.39904	0.460402	0.0651975	0.519508
	D3 / A3	0.384156	0.103585	0.0626803	0.555213	0.291933	0.0329386	0.00264328	0.114827	0.00717835	0.0579444	0.0508649	0.409761	0.010695
	D3 / Cv3	0.168424	0.0807312	0.116338	0.00290939	0.0503591	0.0347004	0.000296482	0.0756153	0.0865728	0.137044	0.689911	0.124596	0.0158462
	Cd3 / A3	0.4747	0.219619	0.0944854	0.0145058	0.776072	0.0810303	0.17884	0.526686	0.0217075	0.328829	0.0282397	0.199116	0.0205756
	Cd3 / Cv3	0.217018	0.168574	0.273299	0.376551	0.379261	0.0286323	0.105459	0.257886	0.0364404	0.977476	0.249941	0.524335	0.0801992
	Cv3 / A3	0.518944	0.594454	0.855484	0.00278017	0.341951	0.00569019	0.953615	0.451697	0.000187424	0.194954	0.0299657	0.405941	0.103267
